# Supplementary material
Source: HighWire-hosted journal article supplement (https://bmjopen.bmj.com/content/13/2/e066329)
Supplement: inline-supplementary-material-4 [file inline-supplementary-material-4.pdf]

## Characteristics of the included studies

| First author, year                                                        | Population grouping                                          | Aim(s)                                                                                                                                                        | Study design and methods                                                                          | Study setting (country, section of acute care [e.g. ED]) | Intervention / model of care/ pathway                                                                                                                                                                                                          | Comparison                                                                                                       | Participants (population and sample, including numbers)                                                                             | Injury Severity Score (ISS)                       | Outcome measures collected                                                                                                                                                                                         |
|---------------------------------------------------------------------------|--------------------------------------------------------------|---------------------------------------------------------------------------------------------------------------------------------------------------------------|---------------------------------------------------------------------------------------------------|----------------------------------------------------------|------------------------------------------------------------------------------------------------------------------------------------------------------------------------------------------------------------------------------------------------|------------------------------------------------------------------------------------------------------------------|-------------------------------------------------------------------------------------------------------------------------------------|---------------------------------------------------|--------------------------------------------------------------------------------------------------------------------------------------------------------------------------------------------------------------------|
| <b>1. FRAILTY PATHWAYS n=1 study</b>                                      |                                                              |                                                                                                                                                               |                                                                                                   |                                                          |                                                                                                                                                                                                                                                |                                                                                                                  |                                                                                                                                     |                                                   |                                                                                                                                                                                                                    |
| Bryant, 2019[34]                                                          | Moderate trauma patients with frailty                        | To determine if an interdisciplinary care pathway for frail geriatric trauma patients improved in-hospital mortality, complications, and 30-day readmissions. | Retrospective cohort study                                                                        | USA, urban level 1 trauma centre                         | Frailty Identification and Care Pathway including (1) education, (2) frailty screening (3) early initiation of geriatric-focused care processes                                                                                                | Pre-implementation (April 2015 to March 2016), and one year post-implementation (October 2016 to September 2017) | n=269 trauma patients aged 65+; pre-implementation n= 125 pre-frail or frail patients, post-implementation n=190 screened as frail. | Mean (SD) ISS pre-11.46 (5.96), post 11.78 (6.18) | Delirium; major complications; in-hospital mortality; 30-day readmission                                                                                                                                           |
| <b>2. GERIATRIC TRAUMA CONSULTATION ALONE IN OLDER PEOPLE n=7 studies</b> |                                                              |                                                                                                                                                               |                                                                                                   |                                                          |                                                                                                                                                                                                                                                |                                                                                                                  |                                                                                                                                     |                                                   |                                                                                                                                                                                                                    |
| Fallon, 2006[48]                                                          | Moderate trauma patients described as 'older' or 'geriatric' | To evaluate the impact of a Geriatric Trauma Consultation Service                                                                                             | Retrospective cohort study, using prospectively collected medical record and trauma registry data | USA, level I trauma centre                               | Mandatory geriatric consult (assessment and advise on treatment and management) at ICU stage of care, provided by a geriatric trauma team (GTT) composed of geriatricians and an advance practice nurse (APN)<br><br>=SEEN group, 2004 onwards | Not seen by the geriatric consult service = UNSEEN group, 2004 onwards                                           | n=285 trauma admissions age 65 and older; n=114 (40%) seen by the GTT,                                                              | ISS median 9.8; n=171 unseen, ISS median 9.1      | Physician adherence to the consultation team's recommendations; Overall length of stay (LOS) and LOS on ICU; discharge disposition; types of issues addressed by GTT recommendations; mortality and cause of death |

|                       |                                                           |                                                                                                                                                               |                                                                                                  |                                     |                                                                                                                                                                                                                                                                   |                                                                                                                                                                        |                                                                                                                                                                                                                                                             |                                                                                         |                                                                                                                                                                                                                                                                                            |
|-----------------------|-----------------------------------------------------------|---------------------------------------------------------------------------------------------------------------------------------------------------------------|--------------------------------------------------------------------------------------------------|-------------------------------------|-------------------------------------------------------------------------------------------------------------------------------------------------------------------------------------------------------------------------------------------------------------------|------------------------------------------------------------------------------------------------------------------------------------------------------------------------|-------------------------------------------------------------------------------------------------------------------------------------------------------------------------------------------------------------------------------------------------------------|-----------------------------------------------------------------------------------------|--------------------------------------------------------------------------------------------------------------------------------------------------------------------------------------------------------------------------------------------------------------------------------------------|
| Lenartowicz, 2012[40] | Major trauma patients described as 'older' or 'geriatric' | To describe and evaluate an inpatient geriatric trauma consultation service (GTCS)                                                                            | Before and after case series comparison on clinical outcomes pre and post implementation of GTCS | Canada; Level I trauma centre       | Patients referred to a Geriatric Trauma Consultation Service (GTCS) : advanced practice nurse specialist in geriatrics and a geriatrician undertaking a comprehensive geriatric assessment within 72h of admission                                                | Pre-GTCS (March 2005-August 2007) and post-GTCS (September 2007-March 2010)                                                                                            | n=238 pre-GTCS and n=248 post-GTCS patients ≥ 60 years (excluding patients who died on arrival and within ED).                                                                                                                                              | Mean ISS 22 pre-GTCS and 24.7 post-GTCS                                                 | Rate of geriatric consultation; recommendation adherence rate; geriatric-specific in hospital complications; trauma quality indicators; sub-speciality consultation requests; length of stay; mortality; discharges to long term care                                                      |
| Min, 2015[38]         | Major trauma patients described as 'older' or 'geriatric' | To evaluate degree of quality improvement in geriatric care of older patients with acute trauma in hospital impacted by a geriatric consultation intervention | "Pre-post" observational study, using intention to treat, medical record review                  | USA, level 1 academic trauma centre | Geriatric faculty and a rotating geriatric medicine fellow, with a typical practice of daily visits until resolution of geriatric medical and disposition issues for all trauma patients aged 65 years and older requiring hospital admission. From December 2007 | The medical centre's usual care, which included the option of requesting a general medical or geriatric consultation, admitted between December 2006 and November 2007 | n=147 patients age 65 years or older admitted to the trauma service, with length of stay >24 hours: n=71 in the control group, (retrospectively identified) and n=76 in the intervention group, (prospectively identified), sequentially admitted patients, | Control group mean (SD) ISS 14.3 (9.28); intervention groups mean (SD) ISS 15.3 (9.98). | Quality of Care (QOC) score (aggregated from 33 Assessing the Care of Vulnerable Elders 'ACOVE-3' quality indicators categorised by subtype: geriatric condition-based care versus non-geriatric care, delirium care (vs all other care), and care to promote mobility (vs all other care) |
| Olufajo, 2016[52]     | Major trauma patients described as                        | To evaluate the implementation of mandatory geriatric consults for all trauma                                                                                 | Prospective and retrospective observational study, using chart review                            | USA, level 1 trauma centre          | Geriatric consult protocol (October 2013 through September 2014). delivered by a geriatrician within                                                                                                                                                              | Trauma patients admitted before activation of the protocol (June 2011                                                                                                  | n=406 patients; n=215 in the pre-intervention group and n=191 in the                                                                                                                                                                                        | Mean [SD] Injury Severity Score was similar in both groups                              | In-hospital mortality, 30-day mortality (within 30 days of discharge), ICU readmission                                                                                                                                                                                                     |

|                      |                                                              |                                                                                                                          |                                                                                                          |                               |                                                                                                                                                                                                                                                                                    |                                                                               |                                                                                                                                                                             |                                                                                                    |                                                                                                                                                                                                                                                                                |
|----------------------|--------------------------------------------------------------|--------------------------------------------------------------------------------------------------------------------------|----------------------------------------------------------------------------------------------------------|-------------------------------|------------------------------------------------------------------------------------------------------------------------------------------------------------------------------------------------------------------------------------------------------------------------------------|-------------------------------------------------------------------------------|-----------------------------------------------------------------------------------------------------------------------------------------------------------------------------|----------------------------------------------------------------------------------------------------|--------------------------------------------------------------------------------------------------------------------------------------------------------------------------------------------------------------------------------------------------------------------------------|
|                      | ‘older’ or ‘geriatric’                                       | patients 70 years or older.                                                                                              |                                                                                                          |                               | 24 hours of admission (weekdays) or at the beginning of the next week following weekend admission for all trauma patients aged 70 years and older identified prospectively                                                                                                         | through June 2012) who would have been eligible for geriatric consults        | post-intervention group.                                                                                                                                                    | (14.29 [7.6] vs 13.56 [8.7]).                                                                      | (within the incident hospitalisation), 30-day readmission (within 30 days of hospital discharge), and hospital length of stay.                                                                                                                                                 |
| Southerland 2017[53] | Moderate trauma patients described as ‘older’ or ‘geriatric’ | To examine the effectiveness of implementing a geriatric consultation model of care, called the GeriTrauma collaboration | Retrospective chart review, using the institutional Trauma databank and electronic medical record system | USA, level 1 trauma centre    | Trauma physician and care providers’ education; geriatric consultation triggers; geriatric consultation usually within 24 hours of admission, with follow-up until resolution or discharge.<br><br>Implemented in July 2014. Pre-implementation period July 2013 to December 2013. | Post-implementation period July 2014 to December 2014                         | n=245 of 391 charts included for adults 65+ years old admitted to the trauma service with inpatient stay >24 hours); n=48 pre-implementation and n=197 post implementation. | Mean [SD] ISS 9.5 [8.1]; geri trauma 8.7 [1.7], trauma 10.1 [9.7], p 0.83.                         | Consultation rates; ICU length of stay; initial documentation; proportion of accomplished TQIP Geriatric Trauma quality indicators; discharge quality indicators – length of stay, inpatient survival, discharge to higher care need environment; 90-day hospital readmissions |
| Wong, 2017[42]       | Major trauma patients described as ‘older’ or ‘geriatric’    | To describe the sustainability and process improvements of an inpatient geriatric trauma consultation service            | Prospective cohort using medical record and trauma registry review of implementation and                 | Canada; level 1 trauma centre | Sustainability interventions based on workflow assessment, staff interviews and survey to identify gaps in the geriatric trauma consultation                                                                                                                                       | Implementation (pre-sustainability interventions) phase; Sept 2007 - Mar 2010 | Patients aged 65 years and older admitted to the trauma service (not dead on arrival or died in the ED); Implementation phase n=246 patients;                               | Implementation phase mean (SD) ISS 24.7 (14.1) and Sustainability phase mean (SD) ISS 24.1 (11.5); | Percentage of patients who received a comprehensive geriatric assessment; Reasons for no assessment by the geriatric trauma consultation                                                                                                                                       |

|                  |                                                              |                                                                                                                                                               |                                                                            |                             |                                                                                                                                                                                                                                                                                                                                                |                                            |                                                                                            |                                                                                              |                                                                                                                                                                                                                                                                                                                           |
|------------------|--------------------------------------------------------------|---------------------------------------------------------------------------------------------------------------------------------------------------------------|----------------------------------------------------------------------------|-----------------------------|------------------------------------------------------------------------------------------------------------------------------------------------------------------------------------------------------------------------------------------------------------------------------------------------------------------------------------------------|--------------------------------------------|--------------------------------------------------------------------------------------------|----------------------------------------------------------------------------------------------|---------------------------------------------------------------------------------------------------------------------------------------------------------------------------------------------------------------------------------------------------------------------------------------------------------------------------|
|                  |                                                              |                                                                                                                                                               | sustainability phases                                                      |                             | service (advanced practice nurse in geriatrics, geriatrician, resident physician within 72 hours of admission):<br><br>July to Dec 2013                                                                                                                                                                                                        |                                            | Sustainability phase n=138 (n=77 with prospective data collection)                         |                                                                                              | service; Geriatric-specific in hospital complications and trauma quality indicators; Discharge destination; Frequency of geriatric issues addressed by the geriatric trauma consultation service, mean number of issues per participant and number of recommendations made; Trauma team adherence rate to recommendations |
| Cortez, 2018[41] | Moderate trauma patients described as 'older' or 'geriatric' | To assess the impact of implementation of a geriatric trauma protocol (GTP) based on American College of Surgeons recommendations to improve patient outcomes | Quasi-experimental non-equivalent group design, using patient chart review | USA, level II trauma centre | Implementation involved 1) training for surgical residents on a Geriatric Trauma Protocol (GTP). 2) GTP including ISAR screening to geriatric consultation; medication review, toxicology screen, assessment for hypoperfusion, review of comorbidities, geriatrician referral if appropriate, involvement of family members, consideration of | Three months pre-intervention, during 2016 | n=117; all patients 65+ years old who were admitted to the hospital as a trauma case; n=77 | Pre-intervention mean [SD] ISS 7.16 [6.1], and n=40 post-intervention mean ISS 10.75 [7.4]). | Length of stay, discharge destination, mortality, medical complications, processes of care                                                                                                                                                                                                                                |

|                                                                                                |                                                              |                                                                                                |                                                                                             |                                           |                                                                                                                                                                                                                                                                                                                                                                                                                                                                                           |                                                                              |                                                                                                                                                                                                                                                              |                                                                                              |                                                                    |
|------------------------------------------------------------------------------------------------|--------------------------------------------------------------|------------------------------------------------------------------------------------------------|---------------------------------------------------------------------------------------------|-------------------------------------------|-------------------------------------------------------------------------------------------------------------------------------------------------------------------------------------------------------------------------------------------------------------------------------------------------------------------------------------------------------------------------------------------------------------------------------------------------------------------------------------------|------------------------------------------------------------------------------|--------------------------------------------------------------------------------------------------------------------------------------------------------------------------------------------------------------------------------------------------------------|----------------------------------------------------------------------------------------------|--------------------------------------------------------------------|
|                                                                                                |                                                              |                                                                                                |                                                                                             |                                           | palliative care, consideration of delirium, early mobilisation.<br><br>Eight weeks post-intervention during 2016                                                                                                                                                                                                                                                                                                                                                                          |                                                                              |                                                                                                                                                                                                                                                              |                                                                                              |                                                                    |
| <b>3. GERIATRIC-SPECIFIC CARE (including geriatric consultation in some cases) n=4 studies</b> |                                                              |                                                                                                |                                                                                             |                                           |                                                                                                                                                                                                                                                                                                                                                                                                                                                                                           |                                                                              |                                                                                                                                                                                                                                                              |                                                                                              |                                                                    |
| Bradburn, 2012[49]                                                                             | Moderate trauma patients described as 'older' or 'geriatric' | To evaluate the effectiveness of a high risk geriatric protocol                                | Cross-sectional retrospective analysis                                                      | USA, Level II trauma centre               | Geriatric Protocol (GP): multidisciplinary process for patients who are $\geq 65$ with a specific high-risk injury, one or more medical history indicator, and one or more assessment indicator are placed on the geriatric protocol, including pre-specified immediate investigations and treatment, ICU admission and geriatric consult. Implemented 2007. Partial (geriatric consult or patient on the guideline) and Both (geriatric consult and patient on the guideline) 2007-2010. | Patients not receiving geriatric consult nor the guideline.<br><br>2000-2007 | n=4,534 patients aged $\geq 65$ . n= 3,902 were included in analysis due to missing covariates.<br><br>n=2,887 patients did not receive the geriatric protocol; n= 1,015 patients received geriatric protocol (n=609 partial elements, n=406 both elements). | ISS Low (1-9) 52.7%, moderate (10-16) 23.1%, severe (17-25) 15.5%, most severe ( $>25$ ) 8.7 | In-hospital mortality                                              |
| Frederikson, 2013[50]                                                                          | Moderate trauma patients described as                        | To assess the impact of the implementation of four patient care protocols in the critical care | Retrospective pre-test/post-test study, and a post-protocol implementation, with regression | USA, level 1 trauma centre and trauma ICU | Four patient care protocols:<br><ul style="list-style-type: none"><li>Ventilator-associated</li></ul>                                                                                                                                                                                                                                                                                                                                                                                     | Pre-protocol period January 1, 2004 to December 31, 2006                     | All elderly patients (aged $>65$ years) with trauma, excluding patients who died within 48 hours of                                                                                                                                                          | Pre-protocol mean [SD] ISS 9.93 [7.65] and post-protocol phase                               | ICU length of stay; Hospital length of stay; ED discharge location |

|                    |                                                              |                                                                                                                                                                    |                                                                                                     |                                                 |                                                                                                                                                                                                                                                                                |                                                                |                                                                                                                                                                                            |                                                                                                                         |                                                                                    |
|--------------------|--------------------------------------------------------------|--------------------------------------------------------------------------------------------------------------------------------------------------------------------|-----------------------------------------------------------------------------------------------------|-------------------------------------------------|--------------------------------------------------------------------------------------------------------------------------------------------------------------------------------------------------------------------------------------------------------------------------------|----------------------------------------------------------------|--------------------------------------------------------------------------------------------------------------------------------------------------------------------------------------------|-------------------------------------------------------------------------------------------------------------------------|------------------------------------------------------------------------------------|
|                    | ‘older’ or ‘geriatric’                                       | environment within an elderly trauma population                                                                                                                    | discontinuity design                                                                                |                                                 | <p>pneumonia prevention</p> <ul style="list-style-type: none"> <li>• Rib fracture</li> <li>• Massive blood transfusion</li> <li>• Anticoagulation</li> </ul> <p>Post-implementation<br/>January 1, 2007 to December 31, 2009</p>                                               |                                                                | admission for regression analyses. n=902 pre-protocol and n=1156 post-phase                                                                                                                | mean ISS 10.25 [7.24]                                                                                                   |                                                                                    |
| Saillant, 2017[55] | Moderate trauma patients described as ‘older’ or ‘geriatric’ | To determine which evidence-based geriatric protocols were correlated with decreased mortality                                                                     | Cross-sectional observational study, using a survey and data from a state-wide trauma database      | USA, level I and II trauma centres in one state | <p>Survey administered by trained interviewers using a standardised script: description of geriatrics-specific trauma care at each centre, survey date unspecified.</p> <p>Trauma database data 2011 to 2013.</p>                                                              | n/a                                                            | n=26 out of 27 eligible trauma centres participated (n=13 level I, n=13 level II; n=24 teaching hospitals). Risk-adjusted mortality data available for n=101,477 patients aged 65 and over | n/a trauma centre respondents                                                                                           | Definition of an older adult; adoption of TQIP guidelines; risk-adjusted mortality |
| Bradburn, 2018[54] | Moderate trauma patients described as ‘older’ or ‘geriatric’ | To analyse trends in geriatric outcomes with consideration of the impact of a high-risk geriatric protocol (HRGP), and the anticoagulation and trauma alert (ACT). | Longitudinal cohort study, using retrospective data from a prospectively maintained trauma registry | USA, level II trauma centre                     | Two practice management guidelines (PMGs) were implemented for the elderly trauma population: 1) a high-risk geriatric protocol (HRGP) (Bradburn, 2012), implemented February 2006 – Phase 2; and 2) anticoagulation and trauma (ACT) alert, implemented March 2012 – Phase 3. | Baseline control period January 2000 to January 2006 – Phase 1 | <p>n=8,471 geriatric patients (age ≥ 65) admitted with a blunt injury, not burns or DNR.</p> <p>Phase 1 n=1,879 patients ; Phase 2 n=3,393</p> <p>Phase 3: n=3,199</p>                     | <p>Phase 1: ISS mean 12.0 [SD 9.15],</p> <p>Phase 2: ISS mean 11.1[SD 8.29],</p> <p>Phase 3: ISS mean 9.4 [SD 7.32]</p> | Mortality; complications                                                           |
|                    |                                                              |                                                                                                                                                                    |                                                                                                     |                                                 |                                                                                                                                                                                                                                                                                |                                                                |                                                                                                                                                                                            |                                                                                                                         |                                                                                    |

| 4. PALLIATIVE CARE CONSULTATION n=2 studies |                                                           |                                                                                                                                                      |                                                                                             |                            |                                                                                                                                                                                                                                |                                                                                                                                                                                                                                    |                                                                                                                                                |                                  |                                                                                                                                                              |
|---------------------------------------------|-----------------------------------------------------------|------------------------------------------------------------------------------------------------------------------------------------------------------|---------------------------------------------------------------------------------------------|----------------------------|--------------------------------------------------------------------------------------------------------------------------------------------------------------------------------------------------------------------------------|------------------------------------------------------------------------------------------------------------------------------------------------------------------------------------------------------------------------------------|------------------------------------------------------------------------------------------------------------------------------------------------|----------------------------------|--------------------------------------------------------------------------------------------------------------------------------------------------------------|
| Kupensky, 2015[43]                          | Major trauma patients described as 'older' or 'geriatric' | To evaluate the impact of Palliative Medicine Consultation (PMC) on geriatric trauma patients' outcomes                                              | Retrospective, descriptive study, using data from a medical records and the Trauma Registry | USA, Level I trauma centre | Patients who received a PMC after implementation of an institutional practice management guideline requiring PMC on or before post-trauma day two in surgical ICU was implemented; study period July 2013 to November 2014.    | Patients who did not receive a PMC after implementation of an institutional practice management guideline requiring PMC on or before post-trauma day two in surgical ICU was implemented; study period July 2013 to November 2014. | n=202 patients aged 65 years or older, admitted to trauma services in the surgical ICU, and alive 24 hours post hospital admission.            | Average ISS 17.86 (range: 0-57). | Palliative care consultation; evidence of symptom management; advance care goals length of stay in surgical ICU and total in hospital; discharge disposition |
| Lilley, 2016[37]                            | Major trauma patients described as 'older' or 'geriatric' | To study processes associated with complex end-of-life decision making in geriatric patients (≥65 years) admitted with severe traumatic brain injury | Retrospective review of cases                                                               | USA, Level I Trauma Centre | Institutional practice management guideline requiring palliative medicine consultation on or before post-trauma day 2<br><br>In<br><br>'Responders' (GCS > 8 at 72 hours)<br><br>between January 1, 2011 and December 31, 2014 | Institutional practice management guideline requiring palliative medicine consultation on or before post-trauma day 2<br><br>'Non-responders' (GCS ≤ 8 at 72 hours) between January 1, 2011 and December 31, 2014                  | n=90 patients, aged 65 years and older, who were admitted at the centre with TBI and severe neurologic impairment (defined as initial GCS < 8) | Median (IQR) ISS 25 (16-26).     | End of life decision making                                                                                                                                  |

| 5. INTERVENTIONS RELATED TO THE TRIAGE OF OLDER PATIENTS WITH TRAUMA n=8 studies         |                                                              |                                                                                                                                                                                                         |                                                                                                                          |                                                                                |                                                                                   |                                  |                                                                                                                                                                |                                                                                                                                                                                                             |                                                                |
|------------------------------------------------------------------------------------------|--------------------------------------------------------------|---------------------------------------------------------------------------------------------------------------------------------------------------------------------------------------------------------|--------------------------------------------------------------------------------------------------------------------------|--------------------------------------------------------------------------------|-----------------------------------------------------------------------------------|----------------------------------|----------------------------------------------------------------------------------------------------------------------------------------------------------------|-------------------------------------------------------------------------------------------------------------------------------------------------------------------------------------------------------------|----------------------------------------------------------------|
| 5a. TRAUMA CENTRES VERSUS OTHER PROVIDERS, OR LEVELS/TYPES OF TRAUMA CENTRES n=3 studies |                                                              |                                                                                                                                                                                                         |                                                                                                                          |                                                                                |                                                                                   |                                  |                                                                                                                                                                |                                                                                                                                                                                                             |                                                                |
| Meldon, 2002[47]                                                                         | Moderate trauma patients described as 'older' or 'geriatric' | To and examine the association between trauma centre verification and hospital mortality in very elderly trauma patients (>80 years)                                                                    | Retrospective cohort study, using countywide trauma registry data                                                        | USA, all Level I and II trauma centres, and acute care hospitals in one county | Trauma centre care                                                                | Non-trauma centre care           | n=451 patients (level I TC n=38, level II TC n=191, AC n=); >80 years with traumatic injury (not #NOF)                                                         | ISS median (IQR): Level I TC 13 (4-25); Level II TC 5 (4-9); AC 4 (4-9)                                                                                                                                     | Hospital mortality                                             |
| Staudenmayer, 2013[39]                                                                   | Major trauma patients described as 'older' or 'geriatric'    | To determine the current state of triage practice and the associated outcomes for severely injured elderly patients triaged to a level I or II trauma centre with those admitted to a non-trauma centre | Retrospective cohort study using a population-based database                                                             | USA; emergency services translational research network in two states           | Admission to a level I or II trauma centre following an injury call placed to 911 | Admission to a non-trauma centre | n=6,015 patients aged 55 years or older, had presented through the emergency medical systems and been transported to acute care hospitals. n=244 patients with | Injury Severity Score >15. Non-trauma centres ISS less often >15 (2.2% vs 6.7%, p<0.01).                                                                                                                    | 60-day mortality; length of stay; in-hospital costs            |
| Scheetz, 2018[46]                                                                        | Major trauma patients described as 'older' or 'geriatric'    | To conduct a comparative analysis of complications and mortality among severely brain-injured older adults treated at trauma centres and non-trauma centres                                             | Secondary analysis of 2014 data from the Healthcare Cost and utilization Project New York State Inpatient Discharge data | USA: single state                                                              | Admission to trauma centre                                                        | Admission to a non-trauma centre | n= 7138 patient records of patients age 55 years and older with a primary diagnosis of brain injury and initial admission to an acute care hospital; n=1,737.  | Injury Severity Score of >15 (n=143 trauma centre and n=1,594 non-trauma centre). Patients median (IQR) new injury severity score to non-trauma centre = 25 (18-27), to trauma centre = 22 (18-27), p<0.001 | Sixteen specified complications; mortality (in-hospital death) |
| 5b. TRAUMA CENTRES MANAGING A HIGHER PROPORTION OF OLDER TRAUMA PATIENTS n=1 study       |                                                              |                                                                                                                                                                                                         |                                                                                                                          |                                                                                |                                                                                   |                                  |                                                                                                                                                                |                                                                                                                                                                                                             |                                                                |



|                                                                             |                                                              |                                                                                                                                |                                                                                                                                                 |                                                                             |                                                                                                                                                                                                                           |                                                                                                                                                                                    |                                                                                     |                                                                                                                                                                                     |                                                                         |
|-----------------------------------------------------------------------------|--------------------------------------------------------------|--------------------------------------------------------------------------------------------------------------------------------|-------------------------------------------------------------------------------------------------------------------------------------------------|-----------------------------------------------------------------------------|---------------------------------------------------------------------------------------------------------------------------------------------------------------------------------------------------------------------------|------------------------------------------------------------------------------------------------------------------------------------------------------------------------------------|-------------------------------------------------------------------------------------|-------------------------------------------------------------------------------------------------------------------------------------------------------------------------------------|-------------------------------------------------------------------------|
| Zafar 2015[51]                                                              | Moderate trauma patients described as 'older' or 'geriatric' | To determine if older trauma patients have better outcomes at centres that manage a higher proportion of older trauma patients | Retrospective cohort observational study, using the National Trauma Data Bank                                                                   | USA, level I and II trauma centres with at least 500 trauma visits per year | Trauma centres with greater than 50% of older trauma patients, admission years 2007 to 2011                                                                                                                               | All centres categorised into six groups based on proportions of older trauma patients: less than 10%, 10% to 20%, 20% to 30%, 30% to 40%, 40% to 50%, admission years 2007 to 2011 | n=444,038 patients with age >65 years, from 295 Level 1 and Level 2 trauma centres. | ISS: 0-8, 33.2%<br>9-15, 41.2%<br>16-24, 13.9%<br>25-75, 7.9%<br><br>(study team-estimated mean ISS 13.8, based on mid-point assumption in grouped ISS data)                        | Mortality, risk-adjusted mortality ratio (RAMR)                         |
| <b>5c. TRAUMA TEAM ACTIVATION WITHIN THE RECEIVING HOSPITAL n=4 studies</b> |                                                              |                                                                                                                                |                                                                                                                                                 |                                                                             |                                                                                                                                                                                                                           |                                                                                                                                                                                    |                                                                                     |                                                                                                                                                                                     |                                                                         |
| Demetriades, 2002 [35]                                                      | Major trauma patients described as 'older' or 'geriatric'    | To assess the effect of a modified trauma team activation (TTA) policy on mortality and hospital charges                       | Retrospective study, using trauma-registry data over an 8.5 years period to compare outcomes pre- and post-introduction of the new TTA criteria | USA (Southern California), level 1 academic trauma centre                   | Trauma team activation (TTA) to include age 70+ as a criterion, and a protocol on early intensive monitoring and resuscitation and early surgical intensive care unit admission, initiated from March 2000 to August 2001 | Time period prior to new TTA policy, January 1993 to February 2000                                                                                                                 | n=335 patients age 70+ years                                                        | ISS>15, admitted at the site between January 1993 and August 2001. Pre-intervention n=260 patients, mean ISS 25 [SD 10]); post-intervention group n=76 patients mean ISS 24 [SD 7]. | Survival/mortality, functional status on discharge, hospital charges    |
| Rogers, 2012[36]                                                            | Moderate trauma patients described as                        | To investigate outcomes of under-triage of                                                                                     | Retrospective analysis of trauma registry data                                                                                                  | USA, trauma department of one acute hospital                                | Three levels of trauma team response: two Trauma Team Activations                                                                                                                                                         | Did not undergo a trauma team activation (defined as                                                                                                                               | n=3,902 patients aged 65 and over with full data on ISS, Glasgow-Coma score         | ISS >15                                                                                                                                                                             | Mortality according to under-triage, adjusted mortality, complications, |

|                   | 'older' or 'geriatric'                                       | older trauma patients                                                                                 |                                                                                                                              |                                                          | (Code T and Trauma Alert), both with a 10-minute response and trauma team consultation, with a 45 minute response.<br><br>2000 to 2010                                                                                 | under-triage if ISS >15)                                                                                 | (GCS), occurrence of complications, Revised Trauma Score (RTS), level of Trauma Team Activation (TTA), and/or discharge status.                                     |                                                                                              | coumadin use, mechanism of injury                                                                       |
|-------------------|--------------------------------------------------------------|-------------------------------------------------------------------------------------------------------|------------------------------------------------------------------------------------------------------------------------------|----------------------------------------------------------|------------------------------------------------------------------------------------------------------------------------------------------------------------------------------------------------------------------------|----------------------------------------------------------------------------------------------------------|---------------------------------------------------------------------------------------------------------------------------------------------------------------------|----------------------------------------------------------------------------------------------|---------------------------------------------------------------------------------------------------------|
| Sahr, 2013[44]    | Moderate trauma patients described as 'older' or 'geriatric' | To assess the efficacy of the implementation of a rib fracture protocol among elderly trauma patients | Retrospective cohort study, method not described                                                                             | USA; level 1 trauma 2000 to 2016 centre                  | Emergency Department Rib Fracture Protocol Post protocol (2009-2010)                                                                                                                                                   | Treatment according to emergency physician discretion<br><br>Pre-protocol implementation (2007 to 2008): | n=148 trauma patients 65 years of age and older admitted with at least one rib fracture (n= 81 pre-protocol and n=67 post-protocol); n=30 <3 fractured ribs         | Mean [SD] ISS 11.50 [7.20] and n=51 three or more fractured ribs mean [SD] ISS 18.63 [12.44] | Hospital length of stay; ICU length of stay                                                             |
| St John, 2016[45] | Major trauma patients described as 'older' or 'geriatric'    | To investigate the role of trauma team activation in outcomes of elderly trauma patients              | Cohort and case-control study collecting data from a registry maintained on all admitted trauma patients in a single centre. | USA, level 1 trauma centre with a 4-state catchment area | Trauma team activation against injury, mechanism, physiologic variables or required treatment guidelines for a full or modified activation for patients aged 65 years and older January 1, 2011 and December 31, 2012. | Trauma team activation in those aged less than 65 years between January 1, 2011 and December 31, 2012.   | n=10,033 patients >= 18 years of age (n=2,099 aged 65 and over) with complete data on critical variables of trauma team activation and hospital admissions admitted | Mean (SD) ISS: Received TTA 22.2 (14.6); no TTA Mean ISS (SD) 12.6 (10.3)                    | Effectiveness of trauma team activation by age: adverse outcomes, factors associated with poor outcomes |
